# Supplementary material for: Pharmacogenetics and Adverse Events in the Use of Fluoropyrimidine in a Cohort of Cancer Patients on Standard of Care Treatment in Zimbabwe
Source: MDPI journal article supplement (doi:10.3390/jpm13040588), 2023-03-28
Supplement: s1 [file s1]

# Pharmacogenetics and adverse events in the use of fluoropyrimidine in a cohort of cancer patients on standard of care treatment in Zimbabwe

**Table S1:** The frequency of Fluoropyrimidine-related adverse events during the total study period.

|                                  | Total study period, N=50 |                  | During the first 2 cycles, N=27 |                  |
|----------------------------------|--------------------------|------------------|---------------------------------|------------------|
|                                  | Toxicities ( ≥3)         | Toxicities ( ≤2) | Toxicities ( ≥3)                | Toxicities ( ≤2) |
| Treatment cycles, median (Range) | 3 (2-6)                  | 3 (2-6)          | 2                               | 2                |
| <sup>a</sup> Global              | 18 (36)                  | 28 (56)          | 9 (33)                          | 18 (66.6)        |
| Gastrointestinal*                | 2 (4)                    | 10 (20)          | -                               | 8 (29.6)         |
| Nausea                           | 2 (4)                    | 7 (14)           | -                               | 7 (25.9)         |
| Vomiting                         | -                        | 9 (18)           | -                               | 7 (25.9)         |
| Diarrhoea                        | 1 (2)                    | 4 (8)            | -                               | 1 (3.7)          |
| Haematological*                  | 16 (32)                  | 25 (50)          | 9 (33)                          | 14 (51.8)        |
| Neutropenia                      | 9 (18)                   | 22 (44)          | 4 (14.8)                        | 7 (29.6)         |
| Leukopenia                       | 4 (8)                    | 13 (26)          | 2 (7.4)                         | 5 (26)           |
| Thrombocytopenia                 | 2 (4)                    | 8 (16)           | -                               | 3 (11.1)         |
| Anaemia                          | 7 (14)                   | 17 (34)          | 5 (18.5)                        | 9 (33.3)         |
| HFS <sup>b</sup>                 | 1 (2)                    | 21 (42)          | -                               | 6 (22.2)         |

|                                     |       |    |       |    |
|-------------------------------------|-------|----|-------|----|
| Dose reduction <sup>c</sup>         | 3 (6) | NA | 1 (2) | NA |
| Discontinued treatment <sup>d</sup> | 1 (2) | NA | -     | NA |

---

Abbreviations: HFS, hand-foot syndrome; NA, not applicable.

<sup>a</sup>Global includes all fluoropyrimidine-related AEs grade  $\geq 3$ . This also includes dose reduction and treatment discontinuation.

\*Gastrointestinal markers include nausea, vomiting, and diarrhoea.

\*Haematological markers include neutropenia, leukopenia, thrombocytopenia, and anaemia

<sup>b</sup>HFS is defined as palmar-plantar erythrodysesthesia syndrome by the Common Terminology Criteria for Adverse Events version 5.0

<sup>c</sup>Dose reduction of fluoropyrimidines due to a fluoropyrimidine-related AE of grade  $\geq 3$ .

<sup>d</sup>Patients discontinuing treatment with fluoropyrimidines due to a fluoropyrimidine-related AE of grade  $\geq 3$ .

---

**Table S2:** Comparison of severe fluoropyrimidine adverse events with historical and literature cohorts.

|                                                                                                                                            | Sample size | Wild type Patients | DPYD Variant Carrier | Overall     | Reference                            |
|--------------------------------------------------------------------------------------------------------------------------------------------|-------------|--------------------|----------------------|-------------|--------------------------------------|
| <sup>a</sup> Global                                                                                                                        |             | 18 (36)            | 0                    | 18 (36)     |                                      |
| Gastrointestinal                                                                                                                           | 50          | 2 (4)              | 0                    | 2 (4)       | (This study: Zimbabwe Cohort), 2023. |
| Haematological                                                                                                                             |             | 16 (32)            | 0                    | 16 (32)     |                                      |
| <sup>a</sup> Global                                                                                                                        |             | 418 (31)           | 11 (23)              | 429 (30.7)  |                                      |
| Gastrointestinal*                                                                                                                          | 1394        | 167 (12.4)         | 6 (12)               | 173 (12.4)  | (Wigle et al., 2021).                |
| Haematological*                                                                                                                            |             | 157 (11.7)         | 6 (12)               | 163 (11.7)  |                                      |
| <sup>a</sup> Global                                                                                                                        | 7365        | 1821 (33.6)        | 167 (50.2)           | 1888 (34.6) | (Meulendijks et al., 2015).          |
| <sup>a</sup> Global includes all fluoropyrimidine-related AEs grade ≥3. It might not include dose reduction and treatment discontinuation. |             |                    |                      |             |                                      |
| *Gastrointestinal markers include nausea, vomiting, and diarrhoea.                                                                         |             |                    |                      |             |                                      |
| *Haematological markers include neutropenia, leukopenia, thrombocytopenia, and anaemia                                                     |             |                    |                      |             |                                      |

**Table S3:** Members of Consortium for Genomics and Therapeutics in Africa (CGTA)

| SN | Name                      | Email                                                                      | Country      |
|----|---------------------------|----------------------------------------------------------------------------|--------------|
| 1  | Prof. Collen Masimirembwa | <a href="mailto:cmasimirembwa@aibst.edu.zw">cmasimirembwa@aibst.edu.zw</a> | Zimbabwe     |
| 2  | Prof. Collet Dandara      | <a href="mailto:collet.dandara@uct.ac.za">collet.dandara@uct.ac.za</a>     | South Africa |
| 3  | Prof. Oluseye Bolaji      | <a href="mailto:obolaji@oauife.edu.ng">obolaji@oauife.edu.ng</a>           | Nigeria      |
| 4  | Prof. Bernards Ogutu      | <a href="mailto:ogutu6@gmail.com">ogutu6@gmail.com</a>                     | Kenya        |
| 5  | Dr. Ntokozo Ndlovu        | <a href="mailto:ntokozosqo@gmail.com">ntokozosqo@gmail.com</a>             | Zimbabwe     |
| 6  | Prof. Margaret Borok      | <a href="mailto:mborok@gmail.com">mborok@gmail.com</a>                     | Zimbabwe     |
| 7  | Dr Patience Kuona         | <a href="mailto:patiekuona@gmail.com">patiekuona@gmail.com</a>             | Zimbabwe     |
| 8  | Prof. Jonathan Matenga    | <a href="mailto:jonmatenga@gmail.com">jonmatenga@gmail.com</a>             | Zimbabwe     |
